# Supplementary material
Source: bioRxiv or medRxiv preprint supplement (https://medrxiv.org/highwire/filestream/92369/field_highwire_adjunct_files/1/2020.07.29.20164558-2.pdf)
Supplement: Supplementary file [file 2020.07.29.20164558-2.pdf]

---

## **Licensing Agreement CC BY-NC 4.0**

### **Article Title**

Clinical and intestinal histopathological findings in SARS-CoV-2/COVID-19 patients with hematochezia

### **Copyright and Creative Commons License**

The Authors shall retain the copyright to the article effective if and when accepted for publication by *Case Reports in Gastroenterology* (for US government and Commonwealth government employees: to the extent retainable).

The Authors agree to publish the article according to the **Creative Commons Attribution-NonCommercial 4.0 International License** ([CC BY-NC 4.0](http://www.karger.com/Services/OpenAccessLicense)) (<http://www.karger.com/Services/OpenAccessLicense>). This means that any user shall be free to copy and redistribute the material in any medium or format, provided that the use is for non-commercial purposes only, proper credit is given to the Authors as well as the original publisher, and the integrity of the paper is maintained.

### **Exclusive Unlimited License**

The Authors grant S. Karger AG, Basel, an exclusive unlimited license to publish the article in the above-named journal and identify S. Karger AG as the original publisher. The Authors also grant any third party the right to use the article freely as long as the terms of CC BY-NC 4.0 are met.

The Authors shall grant S. Karger AG, Basel, the exclusive unlimited license to regulate and monetize any further use of the published material by a third party that is not covered by CC BY-NC 4.0. Thus, the use of Karger Open Access articles for commercial purposes, which means one primarily intended for commercial advantage or monetary compensation, requires permission in writing from S. Karger AG (via [permission@karger.com](mailto:permission@karger.com) or RightsLink) and may be subject to a fee.

### **Submission Statement**

The Authors must declare with their signatures that they additionally agree to the following points:

- Any financial (funding, stocks, patents, employment, honoraria, royalties) or non-financial (political, personal, professional) interests/relationships that may be interpreted to have influenced the manuscript have been identified in a 'Conflicts of Interest' statement at the end of the manuscript. If there is no conflict of interest, please state "The Authors declare no conflict of interest".
- Financial support for the study as well as any role of funding bodies or others regarding the research or manuscript preparation has been listed in the 'Acknowledgments' section of the manuscript.
- Permission for any tables, images, figures or illustrations that have been published elsewhere have been received in writing from the copyright holder and will be delivered to the Editors if requested.

- All Authors have made a significant contribution to the paper. Each author approves the final version of the submitted manuscript and the submission to *Case Reports in Gastroenterology*.
- The work has not been published previously (in whole or in part), in any language (except as an abstract of 400 words or less), unless so noted in the cover letter and with appropriate references in the text (only for purposes of providing the context for new data). Likewise, the material is not under simultaneous consideration for publication elsewhere.
- Studies on human subjects were conducted in accordance with the Declaration of Helsinki. Accordingly, the Authors declare that subjects have given their informed written consent and that the study protocol was approved by an appropriate ethics committee. Further, the Authors declare that animal experimentation was approved by the appropriate institutional review body.
- The Authors warrant that they have not granted or assigned any rights in the article to any other person or entity, that the article is copyrightable, and that it does not infringe upon any copyright, trademark, or patent.
- The full and correct name, affiliation and E-mail address of all Authors has been entered in the submission system.
- S. Karger AG may provide a cooperating partner ('the Partner') with all the information about the authorship that the Partner essentially requires to carry out appropriately the services agreed with the Publisher. Any data transfer to the Partner is permitted solely in case the provided services are in a close relationship with the publication of the submitted manuscript and specific promotional activities of the respective article and the appropriate journal.

**Every author** must sign with his/her original (handwritten) signature:

| Printed name:  | Email:                   | Signature:                                                                          | Place and Date: |
|----------------|--------------------------|-------------------------------------------------------------------------------------|-----------------|
| Sophie Balzora | sophie.balzora@nyumc.org |  | NY, NY 6/1/20   |
|                |                          |                                                                                     |                 |
|                |                          |                                                                                     |                 |
|                |                          |                                                                                     |                 |
|                |                          |                                                                                     |                 |
|                |                          |                                                                                     |                 |
|                |                          |                                                                                     |                 |

Please print and sign the form, and upload it during submission or fax or e-mail it to:

**S. Karger AG - Medical and Scientific Publishers**  
 Editorial Office *Case Reports in Gastroenterology*  
 Allschwilerstrasse 10  
 CH-4009 Basel (Switzerland)  
**Fax: +41 61 306 14 34**  
**E-Mail: crg@karger.com**
